# Supplementary material for: Association of Care Environment With HIV Incidence and Death Among Orphaned, Separated, and Street-Connected Children and Adolescents in Western Kenya
Source: PubMed Central journal article supplement (PMC8446813; doi:10.1001/jamanetworkopen.2021.25365), 2021-09-16
Supplement: jamanetwopen-e2125365-s001.pdf [file jamanetwopen-e2125365-s001.pdf]

## Supplementary Online Content

Braitstein P, DeLong A, Ayuku D, et al. Association of care environment with HIV incidence and death among orphaned, separated, and street-connected children and adolescents in western Kenya. *JAMA Netw Open*. 2021;4(9):e2125365. doi:10.1001/jamanetworkopen.2021.25365

**eTable 1.** Comparison of Participants in the Cohort Study I Enrollment by Care Environment for All Participants and for Participants Who Were HIV-Negative at Enrollment

**eTable 2.** Outcomes of Participants in the Cohort Study, Phase 1 and Phase 2

**eTable 3.** Results From Sensitivity Analysis Modifying the Year of Censor and Its Impact on the Proportional Hazards and Tests of Statistical Significance

This supplementary material has been provided by the authors to give readers additional information about their work.

**eTable 1.** Comparison of Participants in the Cohort Study | Enrollment by Care Environment for All Participants and for Participants Who Were HIV-Negative at OSCAR I Enrollment

The analysis of death includes all participants, which the analysis for HIV incidence and HIV-free survival includes those HIV-negative at enrollment.

| Variable            | Value             | Cohort for all-cause mortality outcome |            |            | Cohort for HIV acquisition and HIV or death outcomes |            |            |
|---------------------|-------------------|----------------------------------------|------------|------------|------------------------------------------------------|------------|------------|
|                     |                   | CCI                                    | FBS        | SCY        | CCI                                                  | FBS        | SCY        |
|                     |                   | n=1230                                 | n=1230     | n=91       | n=1177                                               | n=1207     | n=90       |
| Age (Years)         | Mean (SD)         | 10.3 (4.8)                             | 10.3 (4.8) | 14.4 (3.3) | 10.4 (4.8)                                           | 10.3 (4.8) | 14.4 (3.3) |
| Age Group           |                   |                                        |            |            |                                                      |            |            |
|                     | <=5               | 229 (18.6)                             | 196 (15.9) | 1 (1.1)    | 214 (18.2)                                           | 195 (16.2) | 1 (1.1)    |
|                     | >5 & <=10         | 300 (24.4)                             | 377 (30.7) | 7 (7.7)    | 282 (24.0)                                           | 369 (30.6) | 7 (7.8)    |
|                     | >10 & <=13        | 282 (22.9)                             | 258 (21.0) | 19 (20.9)  | 271 (23.0)                                           | 250 (20.7) | 19 (21.1)  |
|                     | >13 & <=16        | 285 (23.2)                             | 250 (20.3) | 28 (30.8)  | 278 (23.6)                                           | 247 (20.5) | 28 (31.1)  |
|                     | >16               | 134 (10.9)                             | 149 (12.1) | 36 (39.6)  | 132 (11.2)                                           | 146 (12.1) | 35 (38.9)  |
| Gender              |                   |                                        |            |            |                                                      |            |            |
|                     | Female            | 568 (46.2)                             | 641 (52.1) | 21 (23.1)  | 539 (45.8)                                           | 629 (52.1) | 20 (22.2)  |
|                     | Male              | 662 (53.8)                             | 589 (47.9) | 70 (76.9)  | 638 (54.2)                                           | 578 (47.9) | 70 (77.8)  |
| Orphan Status       |                   |                                        |            |            |                                                      |            |            |
|                     | Double Orphan     | 1047 (85.1)                            | 487 (39.6) | 71 (78)    | 1000 (85)                                            | 479 (39.7) | 70 (77.8)  |
|                     | Maternal Orphan   | 82 (6.7)                               | 128 (10.4) | 4 (4.4)    | 77 (6.5)                                             | 126 (10.4) | 4 (4.4)    |
|                     | Paternal Orphan   | 101 (8.2)                              | 615 (50.0) | 16 (17.6)  | 100 (8.5)                                            | 602 (49.9) | 16 (17.8)  |
| Time with caregiver |                   |                                        |            |            |                                                      |            |            |
|                     | Less than 2 years | 492 (40)                               | 53 (4.3)   | 30 (33)    | 467 (39.7)                                           | 52 (4.3)   | 30 (33.3)  |
|                     | > 5 years         | 281 (22.8)                             | 122 (9.9)  | 11 (12.1)  | 274 (23.3)                                           | 120 (9.9)  | 10 (11.1)  |
|                     | 2-5 years         | 380 (30.9)                             | 153 (12.4) | 31 (34.1)  | 363 (30.8)                                           | 149 (12.3) | 31 (34.4)  |
|                     | all his/her life  | 50 (4.1)                               | 895 (72.8) | 5 (5.5)    | 49 (4.2)                                             | 879 (72.8) | 5 (5.6)    |
|                     | Missing           | 27 (2.2)                               | 7 (0.6)    | 14 (15.4)  | 24 (2.0)                                             | 7 (0.6)    | 14 (15.6)  |

**eTable 2.** Outcomes of Participants in the Cohort Study, Phase 1 and Phase 2

|                                                        | Active**    |             |           | Transitioned Out* |     |     | Dead |     |     | Lost to follow-up |     |     |
|--------------------------------------------------------|-------------|-------------|-----------|-------------------|-----|-----|------|-----|-----|-------------------|-----|-----|
|                                                        | CCI         | FBS         | SCY       | CCI               | FBS | SCY | CCI  | FBS | SCY | CCI               | FBS | SCY |
| <b>##Enrollment</b>                                    | <b>1230</b> | <b>1230</b> | <b>91</b> | -                 | -   | -   | -    | -   | -   | -                 | -   | -   |
| <b>End of phase 1</b>                                  | 982         | 1198        | 88        | 137               | 13  | 0   | 1    | 7   | 3   | 110               | 12  | 0   |
| <b>###Eligible for Enrollment in phase 2</b>           | <b>887</b>  | <b>1198</b> | <b>88</b> | -                 | -   | -   | 1    | -   | -   | -                 | -   | -   |
| <b>Visit 1 in phase 2</b>                              | 508         | 1022        | 54        | 125               | 128 | 0   | 1    | 7   | 6   | 254               | 41  | 28  |
| <b>End of phase 2</b>                                  | 371         | 810         | 52        | 92                | 133 | 1   | 0    | 2   | 0   | 45                | 77  | 1   |
| <b>Total</b> (Cumulative transitions, deaths and LTFU) |             |             |           | 354               | 274 | 1   | 3    | 16  | 9   | 409               | 130 | 29  |

\* Transitioned out includes repatriated home, adopted, aged out, married, moved away, expelled, employed elsewhere, run-away.

\*\* Active includes completed study visit or missed the visit because they were temporarily unavailable (e.g. at school, on a trip, etc).

## This is every participant who got enrolled and was part of our analysis.

### This number excludes those who died at the end of phase 1 or before enrollment into phase 2 and those who were either lost to follow-up or had transitioned out and did not participate in phase 2 of the study.

**eTable 3.** Results From Sensitivity Analysis Modifying the Year of Censor and Its Impact on the Proportional Hazards and Tests of Statistical Significance

| Comparison      | Year of Censor | Death                        | HIV Acquisition*                | Death or HIV Acquisition*       |
|-----------------|----------------|------------------------------|---------------------------------|---------------------------------|
| CCI** vs FBS*** | 4              | 0.12 (0.01, 1.06)<br>p=0.06  | 0.59 (0.16, 2.21)<br>p=0.43     | 0.77 (0.31, 1.92)<br>p=0.57     |
| CCI vs FBS      | 5              | 0.12 (0.01, 1.00)<br>p=0.05  | 0.75 (0.2, 2.73)<br>p=0.66      | 0.74 (0.30, 1.82)<br>p=0.51     |
| CCI vs FBS      | 6              | 0.12 (0.01, 0.95)<br>p=0.04  | 1.26 (0.29, 5.51)<br>p=0.76     | 0.81 (0.30, 2.18)<br>p=0.68     |
| CCI vs FBS      | 7              | 0.29 (0.07, 1.17)<br>p=0.08  | 1.24 (0.29, 5.31)<br>p=0.77     | 0.73 (0.28, 1.92)<br>p=0.53     |
| CCI vs FBS      | 8              | 0.26 (0.07, 1.04)<br>p=0.06  | 1.94 (0.57, 6.61)<br>p=0.29     | 0.77 (0.30, 1.96)<br>p=0.59     |
| CCI vs FBS      | 9              | 0.26 (0.07, 1.04)<br>p=0.06  | 1.49 (0.46, 4.83)<br>p=0.50     | 0.74 (0.29, 1.87)<br>p=0.52     |
| SCY**** vs FBS  | 4              | 2.13 (0.48, 9.46)<br>p=0.32  | 16.65 (4.17, 66.53)<br>p<0.01   | 8.19 (3.12, 21.53)<br>p<0.01    |
| SCY vs FBS      | 5              | 2.99 (0.79, 11.29)<br>p=0.11 | 19.52 (4.97, 76.67)<br>p<0.01   | 7.70 (2.98, 19.94)<br>p<0.01    |
| SCY vs FBS      | 6              | 5.99 (2.21, 16.25)<br>p<0.01 | 24.5 (7.46, 80.45)<br>p<0.01    | 1.81(4.12, 23.34)<br>1.82p<0.01 |
| SCY vs FBS      | 7              | 4.96 (1.90, 12.98)<br>p<0.01 | 27.07 (8.09, 90.62)<br>p<0.01   | 8.61 (3.71, 19.97)<br>p<0.01    |
| SCY vs FBS      | 8              | 5.83 (2.43, 13.99)<br>p<0.01 | 33.97 (10.85, 106.31)<br>p<0.01 | 8.89 (3.99, 19.81)<br>p<0.01    |
| SCY vs FBS      | 9              | 5.83 (2.43, 13.99)<br>p<0.01 | 17.3 (5.84, 51.23)<br>p<0.01    | 8.40 (3.75, 18.81)<br>p<0.01    |

\* Excludes those HIV-positive at enrolment

\*\* CCI: Charitable Children’s Institutions

\*\*\* FBS: Family-based settings

\*\*\*\* SCY: Street-connected children and youth
